# Supplementary material
Source: Springer Nature journal article supplement (https://www.springermedizin.de/resource/supplementary/13045_2013_302_MOESM4_ESM.pdf/9661078)

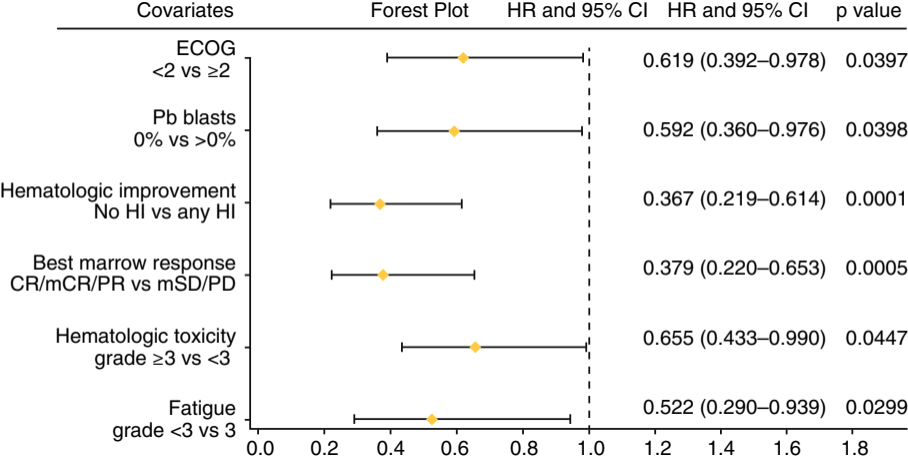

Supplement: MOESM4 [file 9661078]
